# Supplementary material
Source: ML conference proceedings conference paper supplement (https://proceedings.mlr.press/v151/wang22i.html)

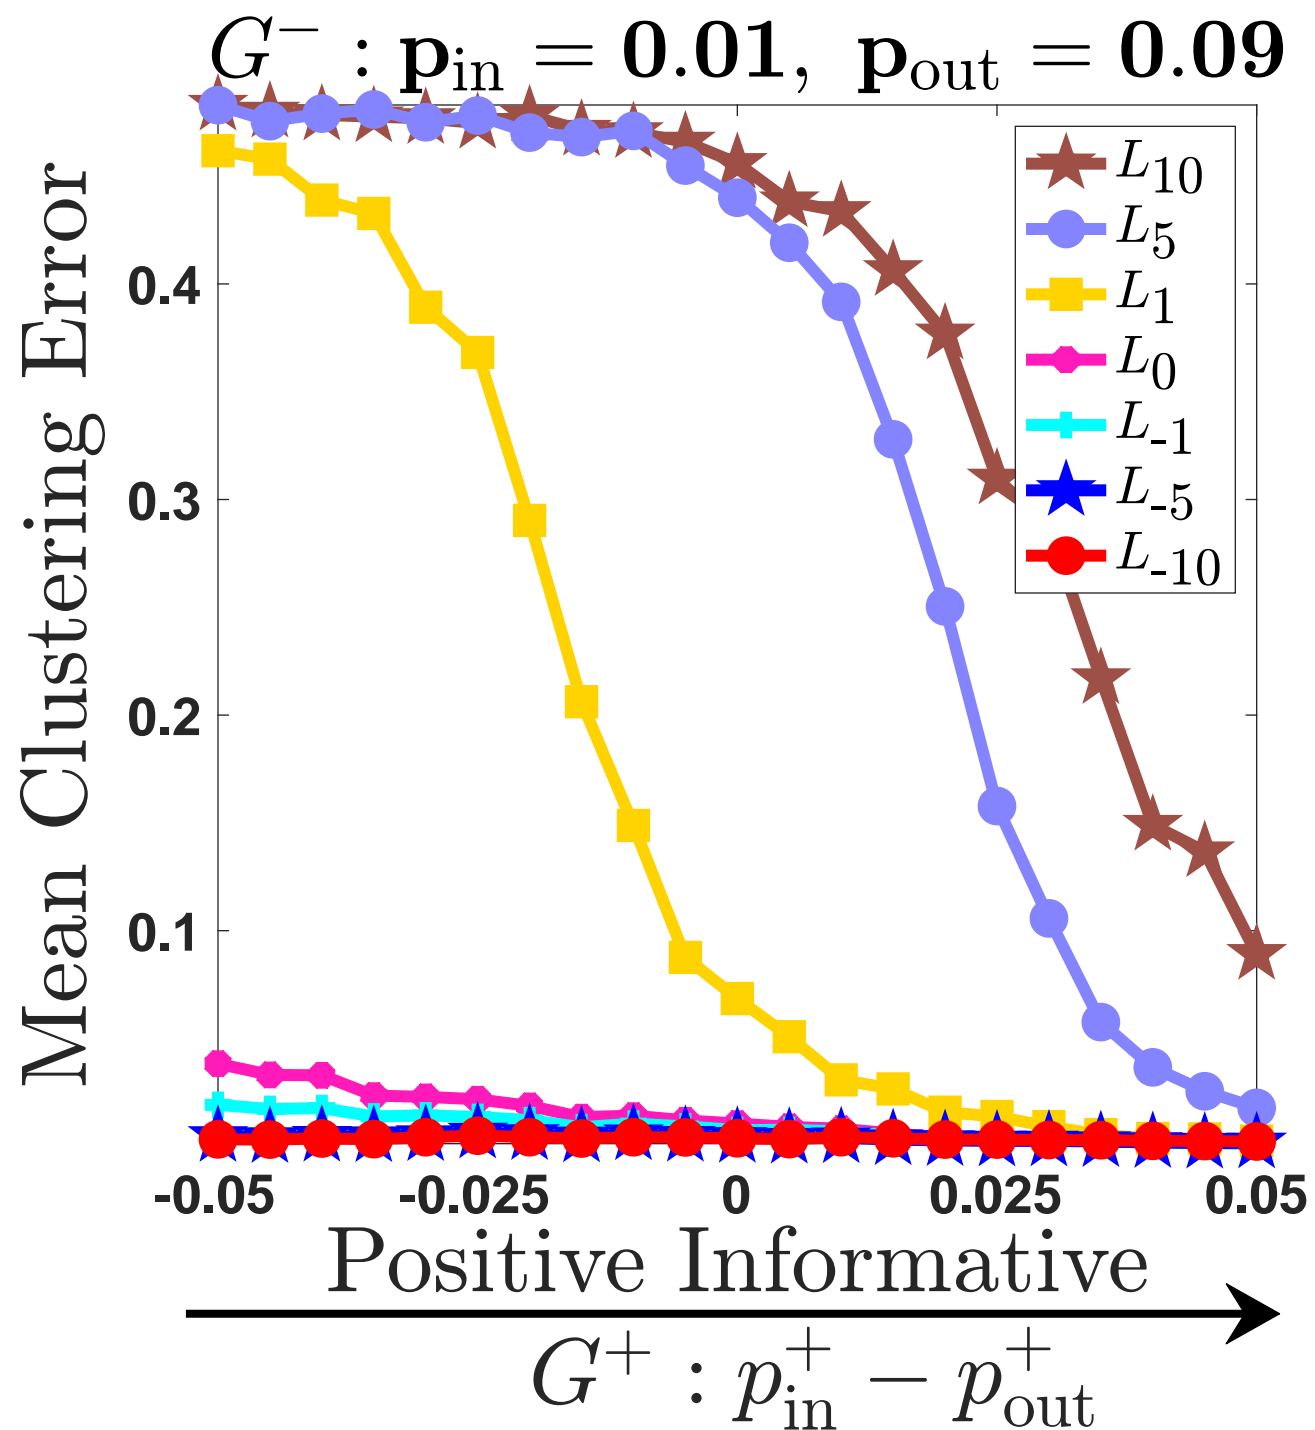

Supplement: Supplementary file 3 [file wang22i-supp.zip]

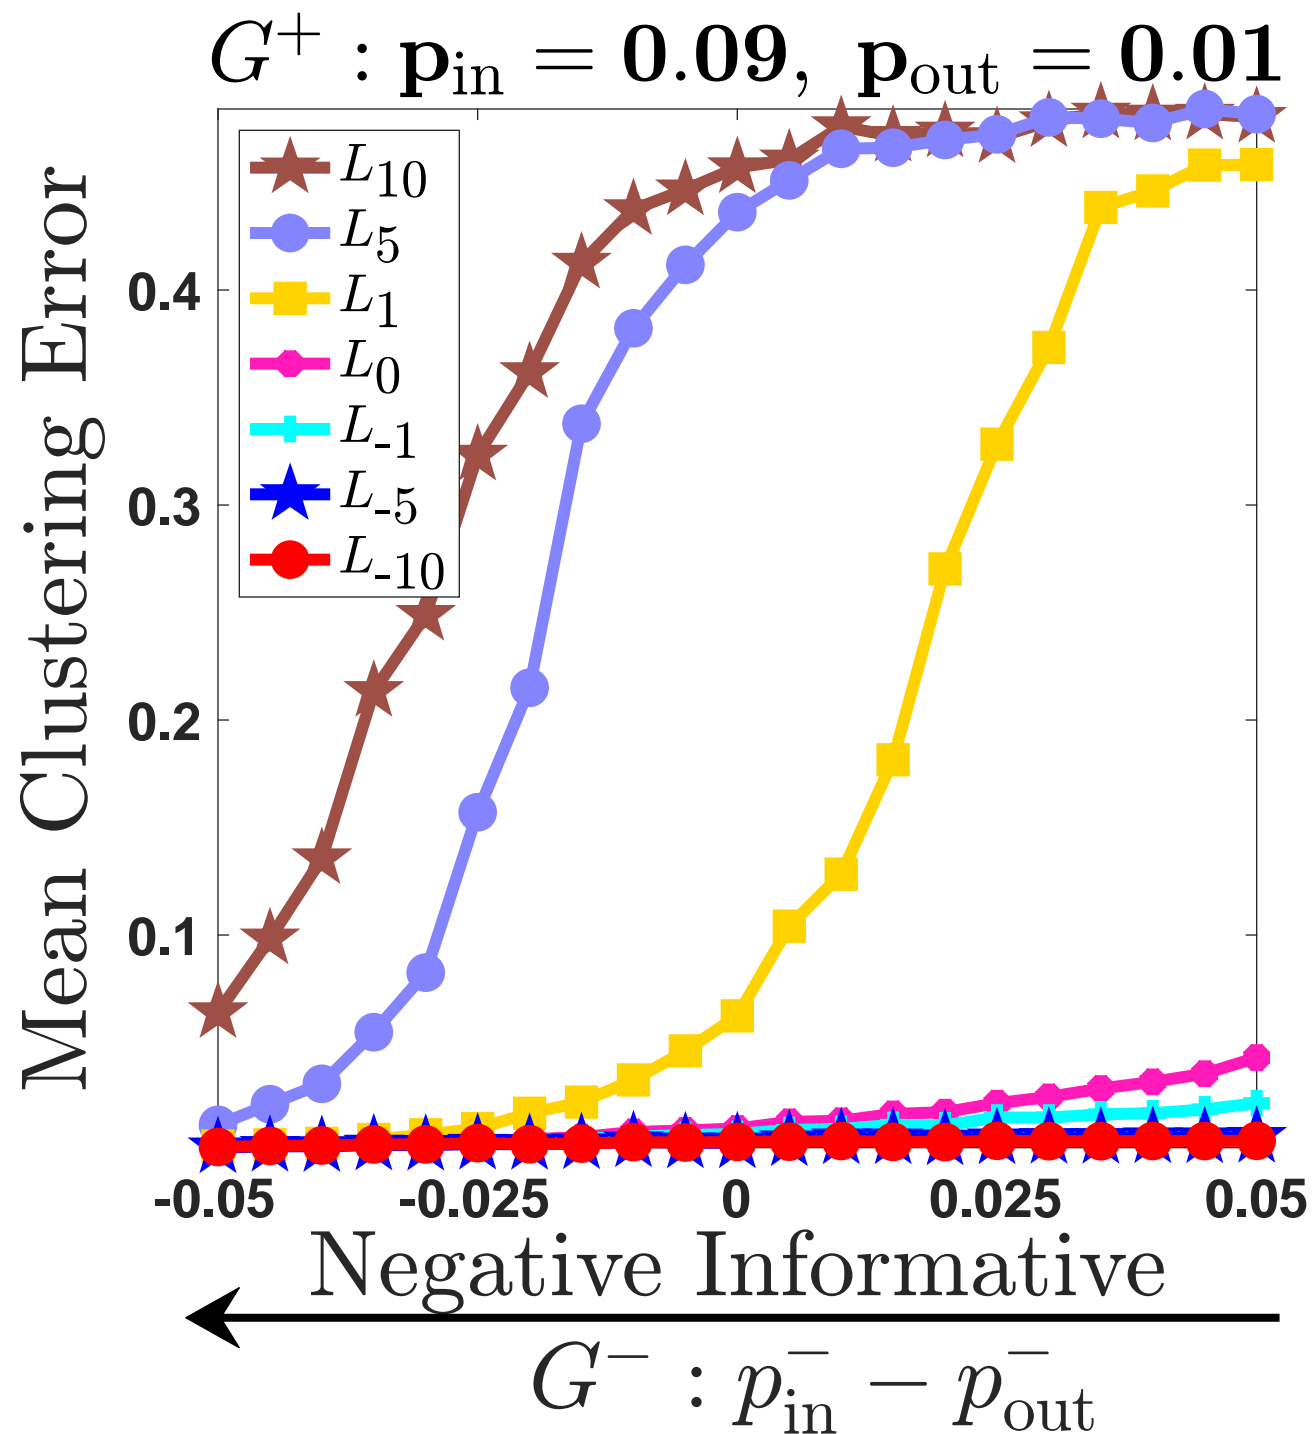

Supplement: Supplementary file 4 [file wang22i-supp.zip]
